# Supplementary material
Source: PubMed Central journal article supplement (PMC4126273)
Supplement: Supp_Data.pdf [file Supp_Data.pdf]

## Supplementary Data

### MATERIALS AND METHODS

#### Cell culture

RAW 264.7 cells were suspended in the complete medium: DMEM supplemented with 10% fetal bovine serum, 100 units/mL penicillin, and 100 µg/mL streptomycin. Cells were plated in 96-well plates at a density of  $1.5 \times 10^4$  cells/well. All experiments were performed in a humidified atmosphere under 5% CO<sub>2</sub> at 37°C.

#### Evaluation of cell viability

Cell viability was measured using the MTT assay. Cells were seeded on 96-well plates and treated for 1 h with *Coriandrum sativum* L. extract (CSE) at doses of 100 and 500 µg/mL, linoleic acid at doses of 1 and 10 µM, or linolenic acid at doses of 1 and 10 µM and/or were stimulated with 100 ng/mL lipopolysaccharide (LPS) for a further 23 h. The treated cells were incubated with 1 mg/mL MTT for 2 h. The MTT medium was aspirated carefully from the wells, and the formazan dye was eluted using DMSO. The absor-

bance was measured using a spectrophotometer (Versamax microplate reader; Molecular Device, Sunnyvale, CA, USA) at a wavelength of 570 nm and was expressed as a percent of the value for the control.

#### Assessment of extracellular nitric oxide generation

The accumulated level of extracellular nitric oxide (NO) in culture supernatants was measured using the colorimetric reaction with the Griess reagent. Cells were seeded on 96-well plates and treated for 1 h with CSE at doses of 100 and 500 µg/mL, linoleic acid at doses of 1 and 10 µM, or linolenic acid at doses of 1 and 10 µM and/or were stimulated with 100 ng/mL LPS for a further 23 h. The 100 µL of supernatants was reacted with the 100 µL of the Griess reagent containing 1% sulfanilamide, 2% phosphoric acid, and 0.1% naphthylethylenediamine for 10 min at dark room temperature. Absorbance was measured at a wavelength of 570 nm using a spectrophotometer and determined the concentrations of extracellular NO by sodium nitrite standard curve.

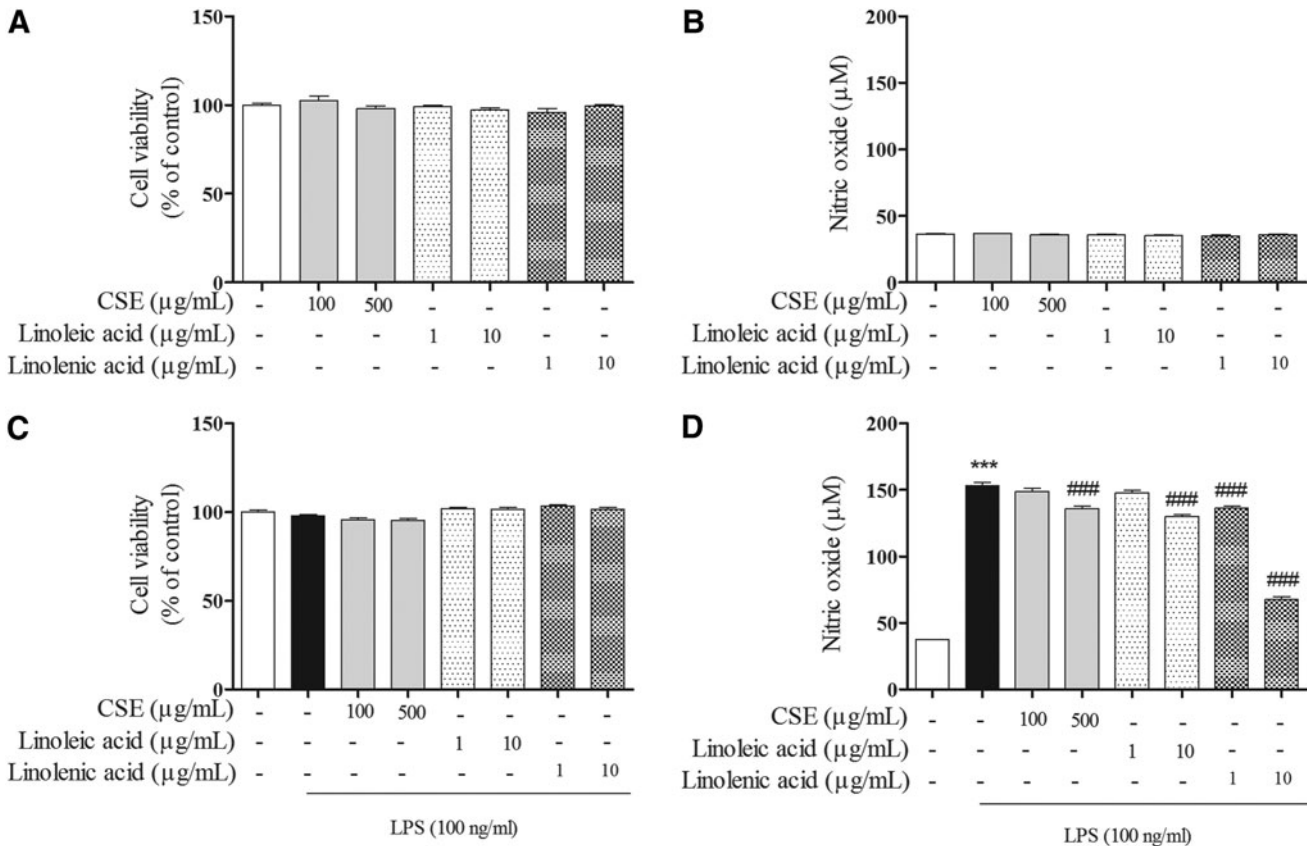

**SUPPLEMENTARY FIG. S1.** Effects of *Coriandrum sativum* L. extract (CSE) on lipopolysaccharide (LPS)-induced inflammatory toxicity in mouse macrophage RAW 264.7 cell line. After cells reached confluence, they were treated with CSE, linoleic acid, or linolenic acid for 1 h and incubated without (**A, B**) or with 100 ng/mL LPS (**C, D**) for a further 23 h. Values are the mean  $\pm$  standard error of the mean. \*\*\* $P < .001$  versus the control group; ### $P < .001$  versus the LPS alone group.
